# Supplementary material for: Network centrality and seasonality interact to predict lice load in a social primate
Source: PubMed Central journal article supplement (PMC4768153; doi:10.1038/srep22095), 2016-02-26
Supplement: srep22095-s1.pdf [file srep22095-s1.pdf]

Supplementary material to the article:

Network centrality and seasonality interact to predict lice load in a social primate.

Julie Duboscq <sup>1,2\*</sup>, Valeria Romano <sup>1,2</sup>, Cédric Sueur <sup>1,2,3</sup>, and Andrew J.J. MacIntosh <sup>4,5</sup>

<sup>1</sup> Centre National de la Recherche Scientifique, Département Ecologie, Physiologie et Ethologie, Strasbourg, France

<sup>2</sup> Université de Strasbourg, Institut Pluridisciplinaire Hubert Curien, Strasbourg, France

<sup>3</sup> Unit of Social Ecology, CP231, Université libre de Bruxelles, Campus Plaine, Brussels, Belgium

<sup>4</sup> Kyoto University Primate Research Institute, Inuyama, Japan

<sup>5</sup> Kyoto University Wildlife Research Center, Kyoto, Japan

\* Corresponding author: [julie.a.m.duboscq@gmail.com](mailto:julie.a.m.duboscq@gmail.com)

## Methods

Table S1: Summary of the study females' characteristics (see main text).

| female ID | observation time (hour) | rank | treatment status*<br>(treated or non-treated) | reproductive state during<br>the mating / other seasons<br>(active or inactive) |
|-----------|-------------------------|------|-----------------------------------------------|---------------------------------------------------------------------------------|
| f00       | 16.8                    | 2    | non-treated                                   | inactive / inactive                                                             |
| f01       | 17.1                    | 14   | treated                                       | active / active                                                                 |
| f02       | 17.4                    | 9    | non-treated                                   | active / active                                                                 |
| f08       | 18.2                    | 11   | non-treated                                   | active / active                                                                 |
| f09       | 17.4                    | 1    | non-treated                                   | active / active                                                                 |
| f11       | 16.2                    | 13   | non-treated                                   | active / active                                                                 |
| f12       | 17.0                    | 8    | treated                                       | inactive / inactive                                                             |
| f13       | 17.9                    | 16   | non-treated                                   | active / active                                                                 |
| f14       | 18.0                    | 18   | treated                                       | inactive / inactive                                                             |
| f15       | 17.8                    | 4    | treated                                       | inactive / inactive                                                             |
| f16       | 18.2                    | 10   | treated                                       | inactive / inactive                                                             |
| f18       | 17.9                    | 6    | non-treated                                   | active / inactive                                                               |
| f19       | 16.9                    | 20   | treated                                       | inactive / inactive                                                             |
| f20       | 16.7                    | 12   | treated                                       | inactive / inactive                                                             |
| f21       | 17.8                    | 5    | non-treated                                   | active / inactive                                                               |
| f22       | 15.3                    | 19   | treated                                       | active / inactive                                                               |
| f23       | 17.5                    | 15   | non-treated                                   | inactive / inactive                                                             |
| f25       | 16.3                    | 17   | treated                                       | active / active                                                                 |
| f26       | 17.4                    | 3    | treated                                       | inactive / inactive                                                             |
| f-ok      | 13.3                    | 7    | treated                                       | no-data / inactive                                                              |

\* seasonal administration of anthelmintic treatment (Ivermectin)

## Results

Table S2: Results of GLMMs testing the influence of seasonal and individual factors on centrality measures (contact network: degree, strength; grooming received network: in-degree, in-strength). Estimates and standard errors ( $\beta \pm SE$ ) with 95% confidence intervals (CI) are presented. Bold font indicates predictors with a significant effect on the response as indicated by CIs excluding 0. Parentheses indicate levels of categorical predictors not present in the intercept.  $\Sigma(p\text{-val. obs.cent.} < p\text{-val. rand.cent.})/nb. \text{ rand.}$  gives the number of times the p value of the LRT between full and null models with observed centrality was lower than the p value of the LRT between full and null models with randomised centrality divided by the number of randomisations (see main text). This gives a new p value, in bold when  $< 0.05$ .

|                                                                                | <b>Degree</b><br>(N = 79)                           | <b>Strength</b><br>(N = 79)                         | <b>In-degree</b><br>(N = 79)                        | <b>In-strength</b><br>(N = 79)                      | <b>Lice load</b><br>(N = 79)                     |
|--------------------------------------------------------------------------------|-----------------------------------------------------|-----------------------------------------------------|-----------------------------------------------------|-----------------------------------------------------|--------------------------------------------------|
| LRT full vs. null ( $\chi^2$ , d.f., p)                                        | <b>36.38, 5, &lt;0.001</b>                          | <b>38.86, 5, &lt;0.001</b>                          | <b>32.83, 5, &lt;0.001</b>                          | <b>37.93, 5, &lt;0.001</b>                          | <b>29.20, 5, &lt;0.001</b>                       |
| Variables                                                                      | $\beta \pm SE$<br>[95% CI]                          | $\beta \pm SE$<br>[95% CI]                          | $\beta \pm SE$<br>[95% CI]                          | $\beta \pm SE$<br>[95% CI]                          | $\beta \pm SE$<br>[95% CI]                       |
| intercept                                                                      | 0.55 $\pm$ 0.23<br>[0.09 1.08]                      | 0.43 $\pm$ 0.23<br>[-0.04 0.91]                     | 0.47 $\pm$ 0.22<br>[-0.03 0.90]                     | 0.29 $\pm$ 0.22<br>[-0.15 0.72]                     | -0.83 $\pm$ 0.16<br>[-1.15 -0.49]                |
| season (spring)                                                                | -0.09 $\pm$ 0.22<br>[-0.56 0.33]                    | 0.07 $\pm$ 0.21<br>[-0.34 0.49]                     | -0.13 $\pm$ 0.24<br>[-0.61 0.34]                    | 0.07 $\pm$ 0.21<br>[-0.34 0.44]                     | 0.25 $\pm$ 0.19<br>[-0.12 0.61]                  |
| season (summer)                                                                | <b>-1.34 <math>\pm</math> 0.23</b><br>[-1.82 -0.93] | <b>-1.26 <math>\pm</math> 0.22</b><br>[-1.67 -0.83] | <b>-1.24 <math>\pm</math> 0.24</b><br>[-1.73 -0.77] | <b>-1.10 <math>\pm</math> 0.21</b><br>[-1.52 -0.68] | <b>0.95 <math>\pm</math> 0.19</b><br>[0.55 1.35] |
| season (fall)                                                                  | <b>-0.73 <math>\pm</math> 0.22</b><br>[-1.15 -0.30] | <b>-0.58 <math>\pm</math> 0.21</b><br>[-0.98 -0.17] | <b>-0.72 <math>\pm</math> 0.24</b><br>[-1.18 -0.24] | <b>-0.55 <math>\pm</math> 0.20</b><br>[-1.00 -0.18] | <b>0.79 <math>\pm</math> 0.20</b><br>[0.38 1.19] |
| reproductive state (active)                                                    | -0.02 $\pm$ 0.25<br>[-0.54 0.48]                    | 0.02 $\pm$ 0.25<br>[-0.45 0.53]                     | 0.12 $\pm$ 0.23<br>[-0.32 0.52]                     | 0.25 $\pm$ 0.24<br>[-0.22 0.72]                     | 0.15 $\pm$ 0.08<br>[-0.02 0.31]                  |
| rank                                                                           | -0.11 $\pm$ 0.14<br>[-0.37 0.13]                    | -0.16 $\pm$ 0.14<br>[-0.43 0.08]                    | <b>-0.28 <math>\pm</math> 0.12</b><br>[-0.54 -0.04] | <b>-0.33 <math>\pm</math> 0.13</b><br>[-0.61 -0.05] | 0.15 $\pm$ 0.16<br>[-0.14 0.47]                  |
| $\Sigma(p\text{-val. obs.cent.} < p\text{-val. rand.cent.})/nb. \text{ rand.}$ | <b>0.022</b>                                        | 0.185                                               | 0.570                                               | 0.941                                               | not applicable                                   |

Table S3: Summary of likelihood ratio tests (LRT) between models with and without interactions and between the final model and an informative null model containing the two constant control factors, treatment and rank, plus season and/or reproductive state (in table “repro”) if not included in an interaction. Results in **bold** indicate when the full model was a significantly better fit than the reduced one; results in *italics* indicate that the full model was only marginally (at  $p < 0.100$ ) a significantly better fit but the interaction(s) had a significant effect on the response and was thus kept in the final model.

|                                                           | Centrality Index                                          | Degree                                                              | Strength                           | In-degree                                        | In-strength                        |
|-----------------------------------------------------------|-----------------------------------------------------------|---------------------------------------------------------------------|------------------------------------|--------------------------------------------------|------------------------------------|
| full model                                                | reduced model                                             | LRT full vs red.                                                    | LRT full vs red.                   | LRT full vs red.                                 | LRT full vs red.                   |
| centrality*season*repro                                   | season*repro<br>+ centrality*season<br>+ centrality*repro | $\chi^2=0.105$<br>d.f.=3<br>p=0.991                                 | $\chi^2=0.39$<br>d.f.=3<br>p=0.606 | $\chi^2=0.07$<br>d.f.=3<br>p=0.995               | $\chi^2=0.38$<br>d.f.=3<br>p=0.336 |
| season*repro<br>+ centrality*season<br>+ centrality*repro | centrality*season<br>+ centrality*repro                   | $\chi^2=0.232$<br>d.f.=3<br>p=0.972                                 | $\chi^2=1.18$<br>d.f.=3<br>p=0.756 | $\chi^2=0.39$<br>d.f.=3<br>p=0.942               | $\chi^2=3.41$<br>d.f.=3<br>p=0.331 |
| centrality*season<br>+ centrality*repro                   | centrality*season                                         | $\chi^2=7.658$<br>d.f.=1<br>p=0.103                                 | $\chi^2=1.36$<br>d.f.=1<br>p=0.243 | $\chi^2=3.32$<br><i>d.f.=1</i><br><i>p=0.069</i> | $\chi^2=0.00$<br>d.f.=1<br>p=0.994 |
| centrality*season<br>+ centrality*repro                   | centrality*repro                                          |                                                                     |                                    | $\chi^2=6.97$<br><i>d.f.=3</i><br><i>p=0.073</i> |                                    |
| centrality*season                                         | centrality<br>+ season<br>+ repro                         | <b><math>\chi^2=9.436</math></b><br><b>d.f.=3</b><br><b>p=0.024</b> | $\chi^2=4.17$<br>d.f.=3<br>p=0.243 |                                                  | $\chi^2=3.87$<br>d.f.=3<br>p=0.275 |
| centrality*repro                                          | centrality<br>+ season<br>+ repro                         |                                                                     |                                    |                                                  |                                    |

|                         | final model | centrality*season                                                      | centrality+season<br>+repro        | centrality*season +<br>centrality*repro                                | centrality+season<br>+repro        |
|-------------------------|-------------|------------------------------------------------------------------------|------------------------------------|------------------------------------------------------------------------|------------------------------------|
| LRT final vs null model |             | <b><math>\chi^2=40.98</math></b><br><b>d.f.=7</b><br><b>p&lt;0.001</b> | $\chi^2=0.05$<br>d.f.=1<br>p=0.823 | <b><math>\chi^2=41.02</math></b><br><b>d.f.=9</b><br><b>p&lt;0.001</b> | $\chi^2=0.31$<br>d.f.=1<br>p=0.577 |

Table S4: Results of GLMMs testing the link between centrality in a contact (degree, strength) or grooming received (in-degree, in-strength) network and lice load. Estimates and standard errors ( $\beta \pm SE$ ) with 95% confidence intervals (CI) are presented. **Bold** font indicates predictors with a significant effect on the response within an interaction only or as a single effect, as indicated by CIs excluding 0. Single predictors included in interactions and control factors included in null models are not considered. Variables separated by a colon indicate an interaction. Parentheses indicate levels of categorical predictors not present in the intercept.  $\Sigma(\beta \text{ obs.cent.} < \beta \text{ rand.cent.})/\text{nb. rand.}$  gives the number of times the observed estimate for centrality was lower than the randomised estimate divided by the number of randomisations (see main text). This gives a right p value that has been converted (between parentheses) into a left one, in bold when  $< 0.05$ , when the estimates were negative (then smaller is actually “bigger”).

|                                                                               | <b>Degree</b><br>(N = 79)                               | <b>Strength</b><br>(N = 79)       | <b>In-degree</b><br>(N = 79)                            | <b>In-strength</b><br>(N = 79)    |
|-------------------------------------------------------------------------------|---------------------------------------------------------|-----------------------------------|---------------------------------------------------------|-----------------------------------|
| Variables                                                                     | $\beta \pm SE$<br>[95% CI]                              | $\beta \pm SE$<br>[95% CI]        | $\beta \pm SE$<br>[95% CI]                              | $\beta \pm SE$<br>[95% CI]        |
| intercept                                                                     | -0.93 $\pm$ 0.20<br>[-1.32 -0.54]                       | -1.13 $\pm$ 0.19<br>[-1.51 -0.75] | -0.81 $\pm$ 0.22<br>[-1.21 -0.32]                       | -1.13 $\pm$ 0.19<br>[-1.50 -0.74] |
| <b>centrality:season (spring)</b>                                             | <b>0.63 <math>\pm</math> 0.25</b><br><b>[0.14 1.12]</b> |                                   | <b>0.71 <math>\pm</math> 0.30</b><br><b>[0.15 1.31]</b> |                                   |
| <b>centrality:season (summer)</b>                                             | 0.24 $\pm$ 0.24<br>[-0.24 0.72]                         |                                   | 0.48 $\pm$ 0.31<br>[-0.19 0.87]                         |                                   |
| <b>centrality:season (fall)</b>                                               | <b>0.60 <math>\pm</math> 0.22</b><br><b>[0.16 1.04]</b> |                                   | 0.72 $\pm$ 0.28<br>[-0.07 0.89]                         |                                   |
| centrality: reproductive state (active)                                       |                                                         |                                   | -0.27 $\pm$ 0.14<br>[-0.55 0.00]                        |                                   |
| centrality                                                                    | -0.61 $\pm$ 0.20<br>[-0.99 -0.22]                       | 0.02 $\pm$ 0.09<br>[-0.16 0.20]   | -0.65 $\pm$ 0.28<br>[-1.22 -0.11]                       | 0.05 $\pm$ 0.09<br>[-0.13 0.23]   |
| season (spring)                                                               | -0.06 $\pm$ 0.22<br>[-0.49 0.36]                        | 0.26 $\pm$ 0.19<br>[-0.11 0.64]   | -0.09 $\pm$ 0.23<br>[-0.54 0.33]                        | 0.26 $\pm$ 0.19<br>[-0.12 0.64]   |
| season (summer)                                                               | 0.35 $\pm$ 0.25<br>[-0.14 0.84]                         | 1.00 $\pm$ 0.22<br>[0.56 1.43]    | 0.34 $\pm$ 0.26<br>[-0.19 0.87]                         | 1.03 $\pm$ 0.21<br>[0.60 1.46]    |
| season (fall)                                                                 | 0.49 $\pm$ 0.21<br>[0.07 0.90]                          | 0.82 $\pm$ 0.20<br>[0.43 1.21]    | 0.41 $\pm$ 0.23<br>[-0.06 0.89]                         | 0.84 $\pm$ 0.20<br>[0.45 1.23]    |
| reproductive state (active)                                                   | 0.33 $\pm$ 0.14<br>[0.03 0.62]                          | 0.29 $\pm$ 0.16<br>[-0.02 0.61]   | 0.33 $\pm$ 0.15<br>[0.05 0.67]                          | 0.27 $\pm$ 0.16<br>[-0.09 0.58]   |
| rank                                                                          | -0.03 $\pm$ 0.08<br>[-0.19 0.12]                        | 0.04 $\pm$ 0.08<br>[-0.13 0.22]   | -0.04 $\pm$ 0.09<br>[-0.24 0.15]                        | 0.06 $\pm$ 0.09<br>[-0.12 0.25]   |
| treatment status (treated)                                                    | 0.71 $\pm$ 0.18<br>[0.36 1.06]                          | 0.45 $\pm$ 0.19<br>[0.08 0.82]    | 0.63 $\pm$ 0.18<br>[0.26 0.99]                          | 0.42 $\pm$ 0.18<br>[0.06 0.79]    |
| $\Sigma(\beta \text{ obs.cent.} < \beta \text{ rand.cent.})/\text{nb. rand.}$ | <b>0.957</b><br><b>(p value left 0.043)</b>             | 0.548                             | 0.917<br>(p value left 0.087)                           | 0.447                             |

**Legend Video S1:** A groomer parts the hair of a groomee with both hands, picks and eats a louse egg <sup>6</sup>. This is a typical example of louse egg-picking while grooming.
